# Supplementary material for: Soil-Transmitted Helminth Reinfection after Drug Treatment: A Systematic Review and Meta-Analysis
Source: PubMed Central journal article supplement (PMC3348161; doi:10.1371/journal.pntd.0001621), 2012-05-08

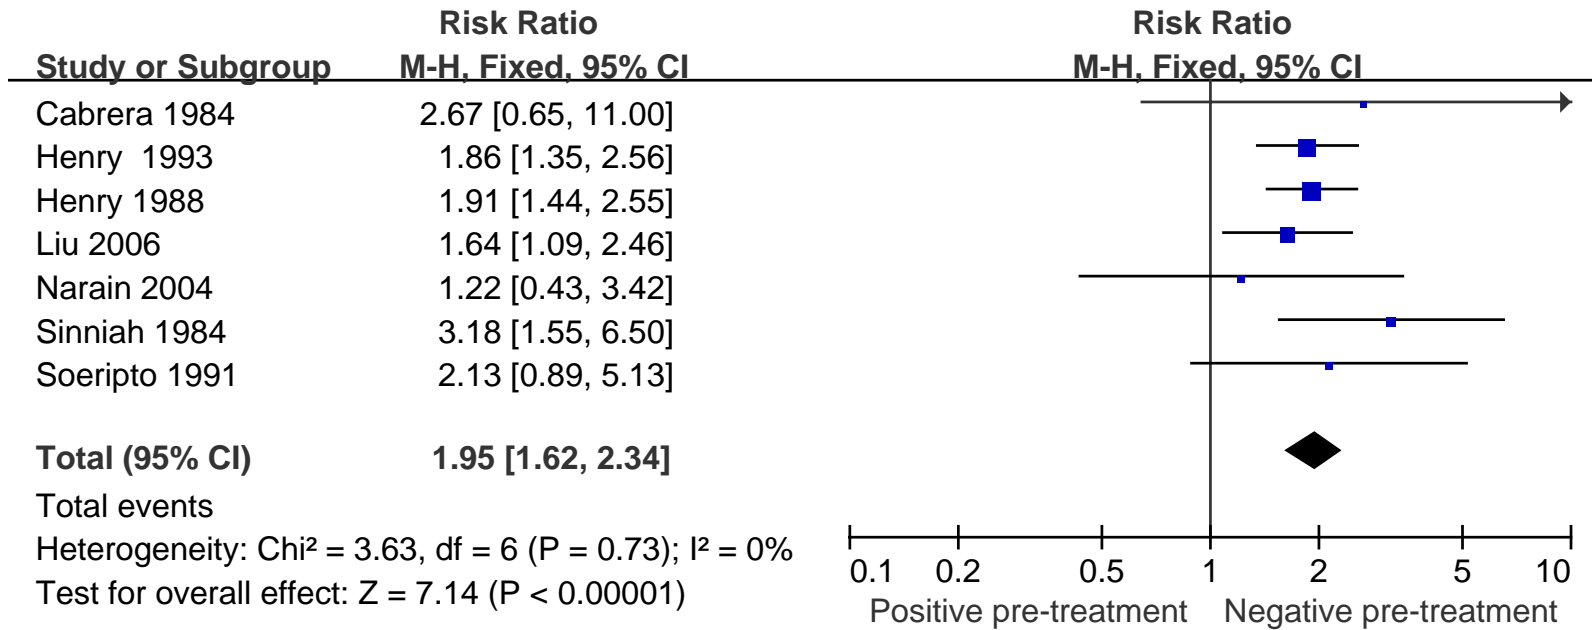

Supplement: pntd.0001621.s001.pdf [file pntd.0001621.s001.pdf]
